# Supplementary material for: Albumin enhances PTX delivery ability of dextran NPs and therapeutic efficacy of PTX for colorectal cancer
Source: Royal Society of Chemistry journal article supplement (doi:10.1039/c9tb00181f), 2019-01-01
Supplement: c9tb00181f1.pdf [file c9tb00181f1.pdf]

## Supplementary Information

### **Albumin enhances dextran NP's delivery and therapeutic efficacy of PTX for colorectal cancer**

Xinyu Zhang <sup>a, b</sup>, Ruhe Zhang <sup>a</sup>, Jun Huang <sup>c</sup>, Moucheng Luo <sup>a</sup>, Xuewen Chen <sup>d</sup>, Yang Kang <sup>\*b</sup>, Jun Wu <sup>\*a, e</sup>

*a Key Laboratory of Sensing Technology and Biomedical Instrument of Guangdong Province, School of Biomedical Engineering, Sun Yat-sen University, Guangzhou, 510006, China. \*E-mail: wujun29@mail.sysu.edu.cn.*

*b The Seventh Affiliated Hospital, Sun Yat-sen University, Shenzhen, 518107, China.*

*\*E-mail:kangyang0543092016@163.com;wujun29@mail.sysu.edu.cn*

*c Department of Colorectal Surgery, The Sixth Affiliated Hospital, Sun Yat-sen University, Guangzhou, 510655, China.*

*d Agriculture and Forestry Yan Jiaxian Innovative Class, Plant Protection, Fujian Agriculture and Forestry University, Fuzhou, 350002, China.*

*e Research Institute of Sun Yat-Sen University in Shenzhen, Shenzhen, 518057, PR China.*

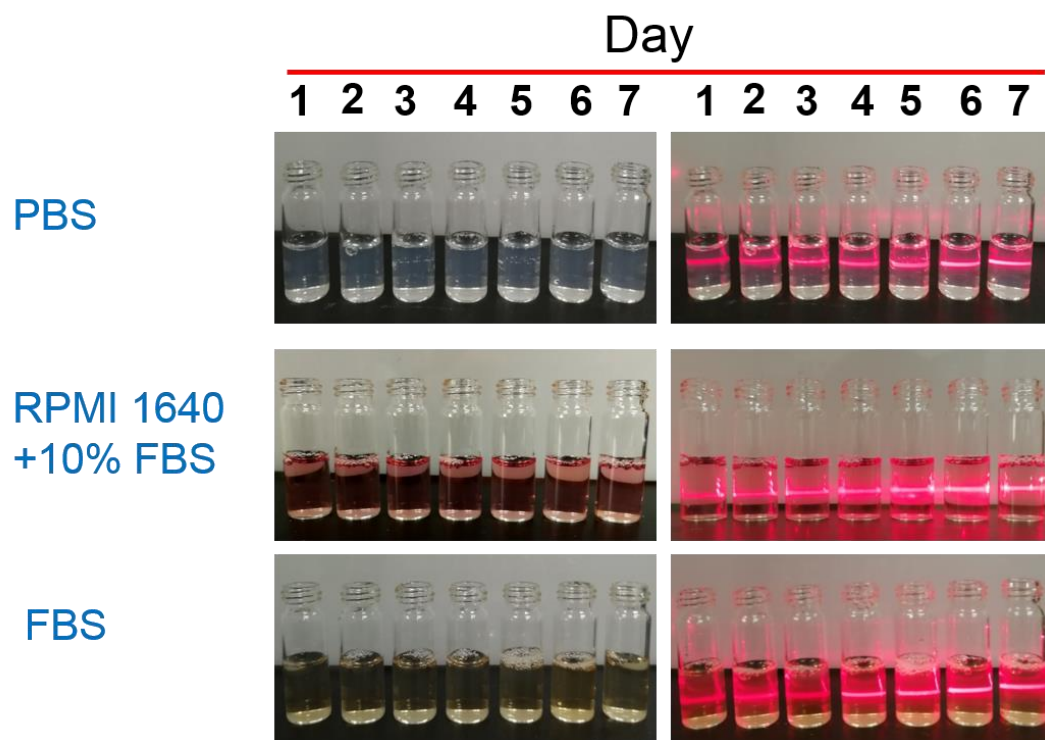

**Fig. S1.** Photos of the stability about Dex<sub>6k</sub>-BSA/PTX NPs dispersed in PBS, fetal bovine serum (FBS) and RPMI-1640 culture media containing 10% FBS for 7 days.

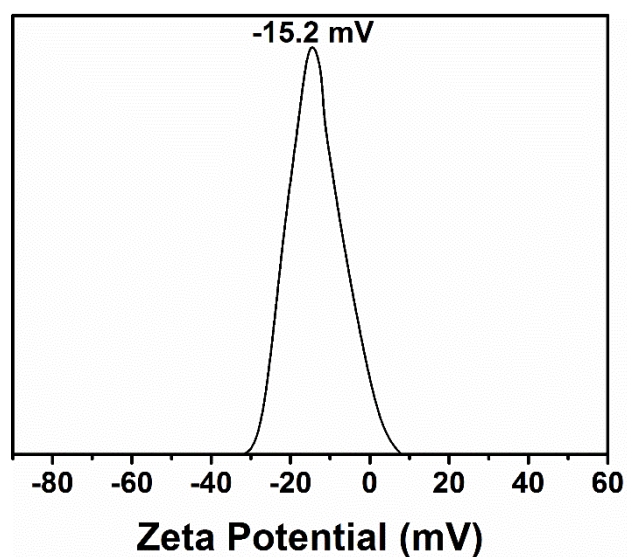

**Fig. S2.** The zeta potential Dex<sub>6k</sub>-BSA/PTX NPs

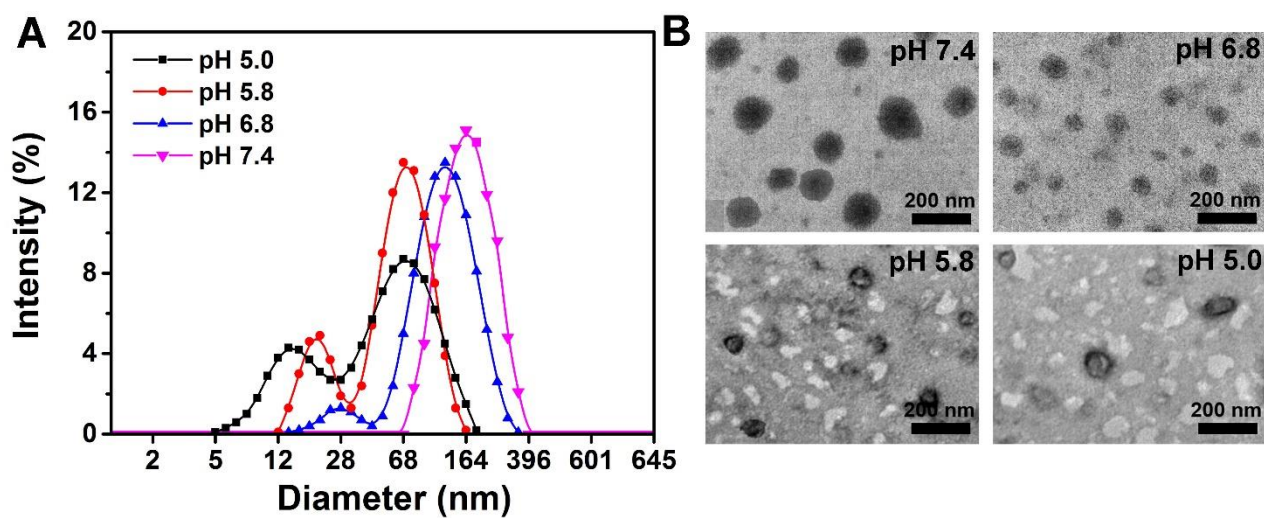

**Fig. S3.** Size distribution (A) and TEM (B) of Dex<sub>6k</sub>-BSA/PTX NPs when treated under different pH values after 4h incubation.

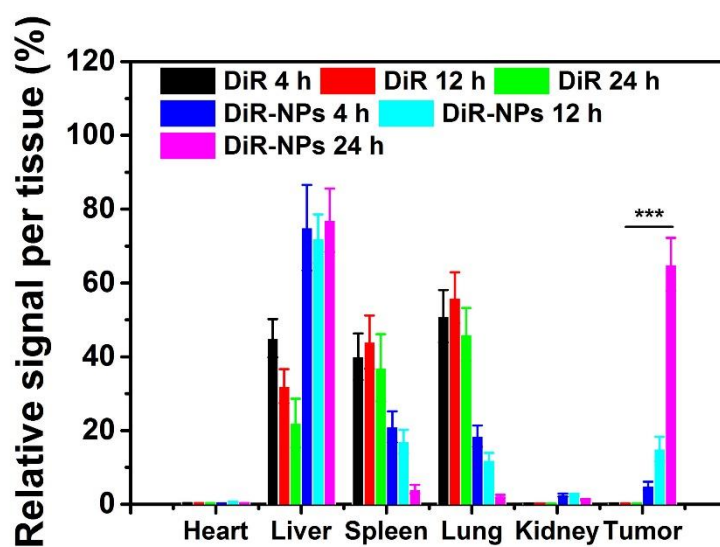

**Fig. S4.** Relative fluorescence signal per tissue as quantified. The data are presented as means  $\pm$  SD ( $n = 3$ ) \*\*\*,  $p < 0.001$ .

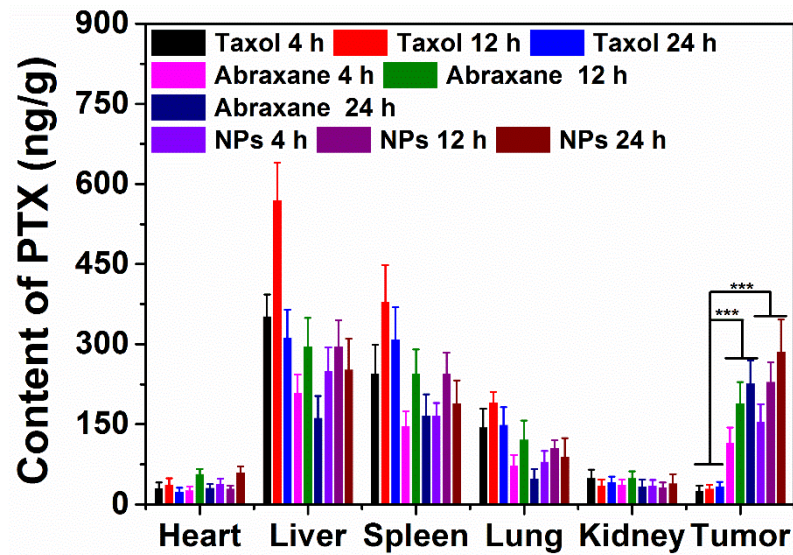

**Fig. S5.** Biodistribution of PTX in tumor and different organs in mouse after administration of Taxol (5 mg/kg), Abraxane (5 mg/kg) and Dex<sub>6k</sub>-BSA-PTX NPs (equivalent 5 mg/kg PTX). The data are presented as means  $\pm$  SD (n = 3) \*\*\*,  $p < 0.001$ .

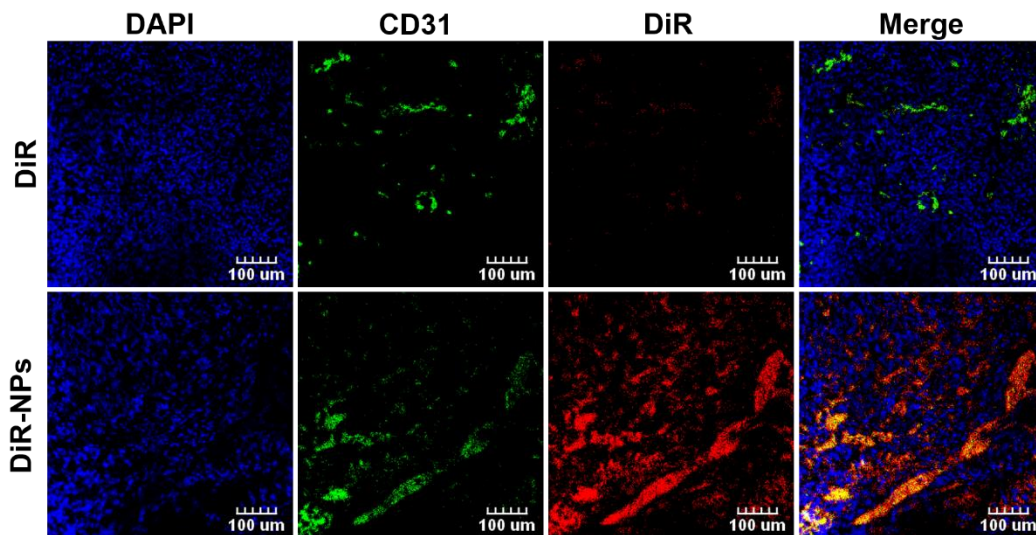

**Fig. S6.** CLSM images of the tumors of CT26 tumor-bearing mice 24 h after i.v. administration of DiR labeled nanoparticles (red). Blood vessels were stained with anti-CD31 (green) and nuclei were visualized with DAPI (blue). Scale bar = 100  $\mu$ m.

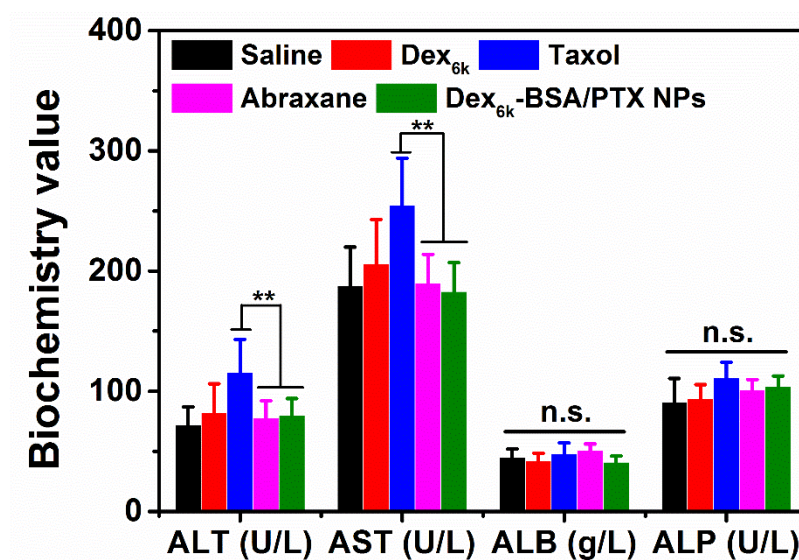

**Fig. S7.** The relevant blood biochemistry analysis of the mice  
The examined parameters of blood biochemistry including the alanine aminotransferase (ALT), aspartate aminotransferase (AST), albumin (ALB) and alkaline phosphatase (ALP).

**Tab. S1** Pharmacokinetics of SD rats post intravenous injection of Taxol, Abraxane and Dex<sub>6k</sub>-BSA/PTX NPs

| Parameter          | Taxol         | Abraxane     | Dex <sub>6k</sub> -BSA/PTX NPs |
|--------------------|---------------|--------------|--------------------------------|
| $T_{1/2}$ (h)      | 5.09 ± 1.53   | 12.93 ± 3.65 | 18.29 ± 5.47                   |
| $C_{max}$ (mg/L)   | 13.11 ± 3.73  | 15.28 ± 1.17 | 15.21 ± 3.77                   |
| MRT (0-∞) (h)      | 6.50 ± 1.87   | 17.39 ± 2.07 | 24.71 ± 6.13                   |
| AUC (0-∞) (h·mg/L) | 38.065 ± 4.98 | 98.57 ± 8.51 | 121.83 ± 38.45                 |
| CL (L/(h·kg))      | 0.26 ± 0.044  | 0.10 ± 0.084 | 0.08 ± 0.026                   |

**Tab. S2** Hematological parameters of the blood collected from mice treated with saline, Dex<sub>6k</sub>, Taxol, **Abraxane** and Dex<sub>6k</sub>-BSA/PTX NPs

|                                     | WBC (10 <sup>9</sup> /L) | RBC (10 <sup>12</sup> /L) | HGB (g/L)   | PLT (10 <sup>9</sup> /L) | MCV (fL)    |
|-------------------------------------|--------------------------|---------------------------|-------------|--------------------------|-------------|
| <b>Saline</b>                       | 4.48 ± 0.36              | 8.53 ± 0.32               | 132.7 ± 8.3 | 840.9 ± 12.7             | 50.4 ± 0.72 |
| <b>Dex<sub>6k</sub></b>             | 4.15 ± 0.24              | 7.87 ± 0.78               | 141.2 ± 6.1 | 742.3 ± 21.8             | 49.2 ± 0.59 |
| <b>Taxol</b>                        | 3.13 ± 0.39↓             | 8.42 ± 1.01               | 147.8 ± 9.5 | 572.1 ± 19.2↓            | 47.8 ± 0.26 |
| <b>Abraxane</b>                     | 4.22 ± 0.31              | 8.24 ± 0.47               | 140.9 ± 8.5 | 812.8 ± 22.9             | 55.2 ± 0.57 |
| <b>Dex<sub>6k</sub>-BSA/PTX NPs</b> | 3.92 ± 0.53              | 7.97 ± 0.28               | 136.9 ± 7.2 | 782.6 ± 17.1             | 52.1 ± 0.97 |
